# Supplementary figures and images for: An evaluation of the microbiota of the upper reproductive tract of women with and without epithelial ovarian cancer
Source: PubMed Central journal article supplement — Gynecol Oncol Rep. 2022 Jun 10;42:101017. doi: 10.1016/j.gore.2022.101017 (PMC9218206; doi:10.1016/j.gore.2022.101017), 2022-06-10

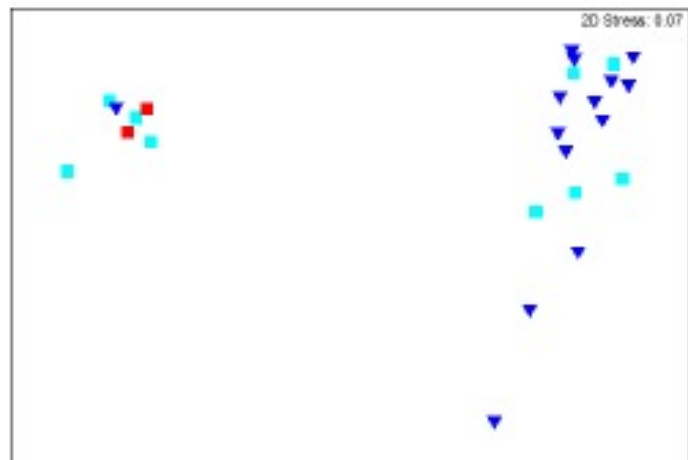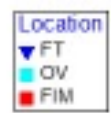

Supplement: mmc2.pdf [file mmc2.pdf]

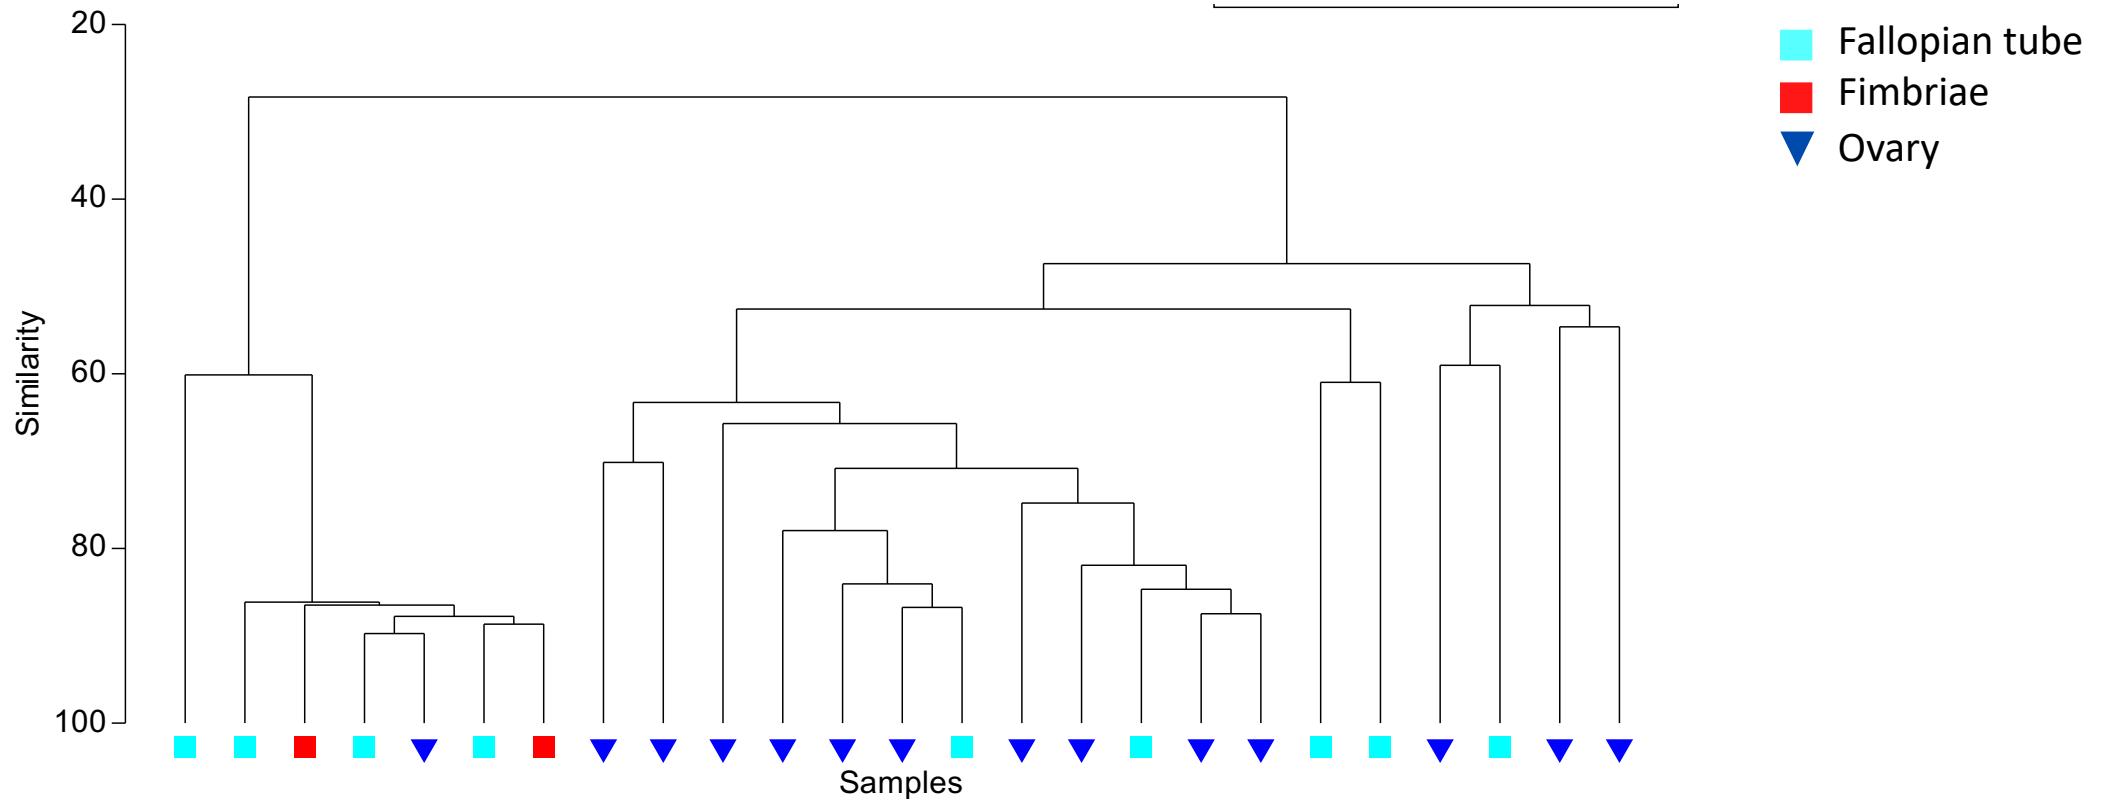

Supplement: mmc3.pdf [file mmc3.pdf]
